# Supplementary material for: Temperature-responsive self-assembled nanostructures from lysine-based surfactants with high chain length asymmetry: from tubules and helical ribbons to micelles and vesicles
Source: Royal Society of Chemistry journal article supplement (doi:10.1039/c9sm00399a), 2019-01-01
Supplement: c9sm00399a1.pdf [file c9sm00399a1.pdf]

## Electronic Supplementary Information (ESI)

for

### Temperature-responsive self-assembled nanostructures from lysine-based surfactants with high chain length asymmetry: from tubules and helical ribbons to micelles and vesicles

Isabel S. Oliveira, Mikail Lo, Maria J. Araújo, Eduardo F. Marques\*

*Centro de Investigação em Química, Departamento de Química e Bioquímica,  
Faculdade de Ciências, Universidade do Porto, Rua do Campo Alegre, nº 687, P-4169-  
007 Porto, Portugal*

\**efmarque@fc.up.pt.*

#### 1. Thermodynamic parameters of phase transitions

Table S1. Thermodynamic parameters associated with the phase transitions of the 8Lys<sub>n</sub> and *m*Lys8 lysine-derived surfactants in water, as obtained from de DSC scans.

| Surfactant | $T_{m,onset}/^{\circ}\text{C}$ |            | $T_m/^{\circ}\text{C}$  |                          | $\Delta_{tr}H_m/\text{kJ}\cdot\text{mol}^{-1}$ |            | $\Delta_{tr}S_m/\text{J}\cdot\text{K}^{-1}\cdot\text{mol}^{-1}$ |             |
|------------|--------------------------------|------------|-------------------------|--------------------------|------------------------------------------------|------------|-----------------------------------------------------------------|-------------|
|            | 1 <sup>st</sup> heating        | reheating  | 1 <sup>st</sup> heating | reheating                | 1 <sup>st</sup> heating                        | reheating  | 1 <sup>st</sup> heating                                         | reheating   |
| 8Lys12     | 14.6 ± 1.0                     |            | 17.2 ± 0.8              |                          | 0.5 ± 0.3                                      |            | 1.8 ± 0.9                                                       |             |
| 8Lys14     | 23.1 ± 0.2                     | 20.9 ± 0.6 | 30.7 ± 0.6              | 30.2 ± 0.4               | 54.2 ± 1.1                                     | 42.0 ± 0.9 | 178.4 ± 3.7                                                     | 138.1 ± 2.8 |
| 8Lys16     | 33.5 ± 1.3                     | 23.9 ± 0.2 | 36.0 ± 0.9              | 30.4 ± 0.4               | 60.6 ± 3.0                                     | 51.4 ± 1.2 | 186 ± 19                                                        | 169.4 ± 4.1 |
| 12Lys8     | 27.7 ± 0.1                     |            | 28.8 ± 0.1              |                          | 10.3 ± 1.3                                     |            | 32.3 ± 2.2                                                      |             |
| 14Lys8     | 31.7 ± 0.8                     | 13.3 ± 0.6 | 35.6 ± 0.6              | 18.6 ± 1.9<br>31.4 ± 0.6 | 58.3 ± 1.1                                     | 50.9 ± 4.9 | 182.0 ± 8.6                                                     | 175 ± 24    |
| 16Lys8     | 25.8 ± 0.4                     | 30.8 ± 2.0 | 37.5 ± 1.1              | 30.8 ± 2.0               | 62.6 ± 3.2                                     | 53.3 ± 1.4 | 201 ± 10                                                        | 176.6 ± 4.6 |

Table S2. Thermodynamic parameters associated with the phase transitions of the 12Lys16 and 16Lys12 lysine-derived surfactants in water, as obtained from de DSC scans.

| Surfactant | $T_{m,onset}/^{\circ}\text{C}$ |            |            | $T_m/^{\circ}\text{C}$  |                          |            | $\Delta_{tr}H_m/\text{kJ}\cdot\text{mol}^{-1}$ |            |             | $\Delta_{tr}S_m/\text{J}\cdot\text{K}^{-1}\cdot\text{mol}^{-1}$ |             |              |
|------------|--------------------------------|------------|------------|-------------------------|--------------------------|------------|------------------------------------------------|------------|-------------|-----------------------------------------------------------------|-------------|--------------|
|            | 1 <sup>st</sup> heating        | reheating  | cooling    | 1 <sup>st</sup> heating | reheating                | cooling    | 1 <sup>st</sup> heating                        | reheating  | cooling     | 1 <sup>st</sup> heating                                         | reheating   | cooling      |
| 12Lys16    | 48.6 ± 0.7                     | 36.5 ± 0.1 | 26.1 ± 2.5 | 51.1 ± 0.6              | 39.2 ± 0.2<br>43.1 ± 0.2 | 28.1 ± 0.2 | 63.4 ± 3.8                                     | 46.9 ± 6.2 | -43.3 ± 2.9 | 195.6 ± 12.0                                                    | 159.3 ± 5.3 | -143.2 ± 9.6 |
| 16Lys12    | 49.8 ± 0.1                     | 44.8 ± 0.3 | 27.0 ± 0.4 | 53.57 ± 0.07            | 46.8 ± 0.2               | 25.3 ± 0.1 | 65.0 ± 1.5                                     | 55.0 ± 1.1 | -54.1 ± 2.8 | 199.6 ± 2.8                                                     | 171.8 ± 3.3 | -180.4 ± 9.2 |

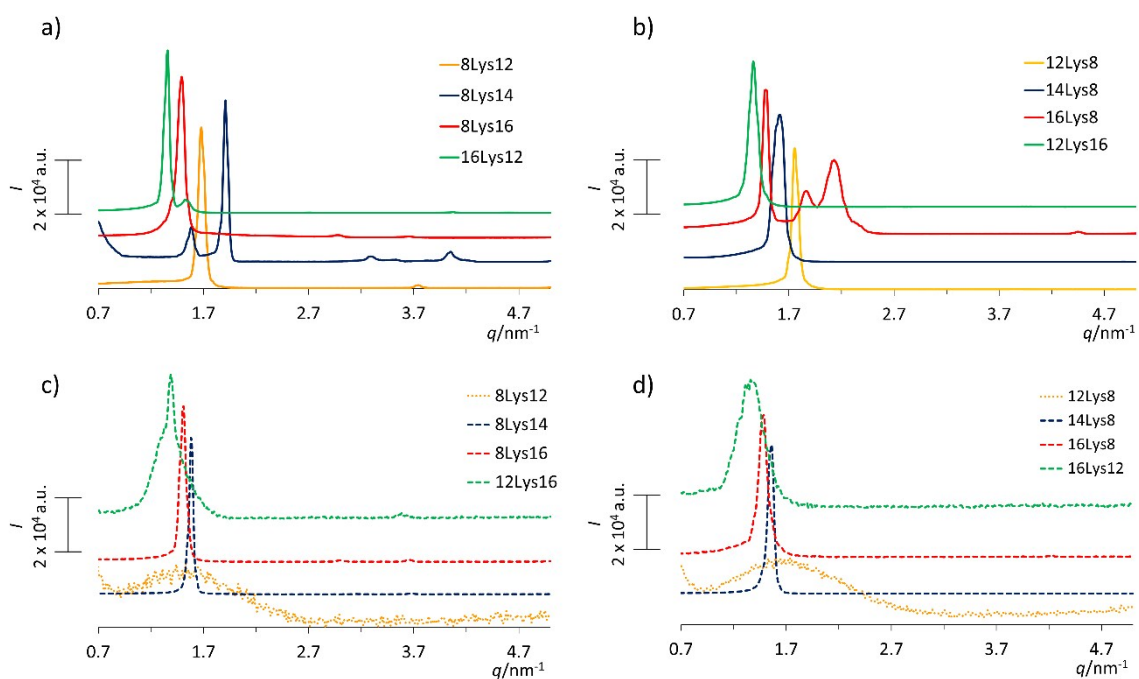

## 2. SAXS data

**Fig. S1** Diffractograms obtained by SAXS for all surfactants studied: a) and b) powder; c) and d) tubule dispersions.

## 3. Tubule-vesicle transition

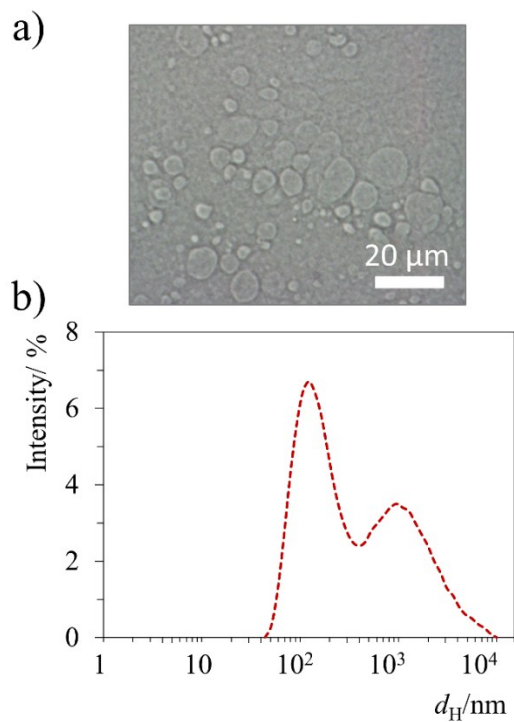

**Fig. S2** Evidence for polydisperse vesicle formation for 16Lys12: a) light micrograph; b) mean size distribution obtained by DLS, both for 0.50 wt% dispersions.

#### 4. Phase scanning data

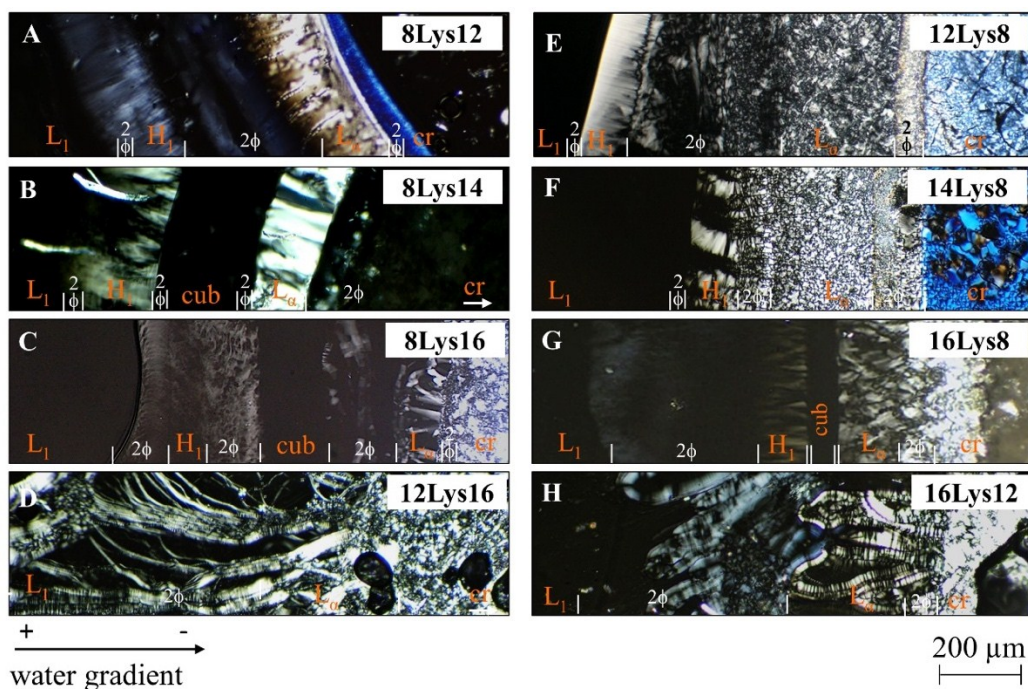

**Fig. S3.** Phase scanning imaging of 8Lys12 (A), 8Lys14 (B), 8Lys16 (C), 12Lys8 (E), 14Lys8 (F), 16Lys8 (G), 12Lys16 (D), and 16Lys12 (H) at 25 °C (A, E), 40 °C (B, C, F, G) and 55 °C (D, H). The images were obtained under polarized light. Abbreviations:  $L_{\alpha}$ , lamellar liquid crystalline phase;  $L_1$ , isotropic phase;  $H_1$ , hexagonal phase; cub, isotropic cubic phase; cr, hydrated crystals.

**Table S3** Summary of the phase sequence observed for the anionic lysine-based surfactants studied. The textures observed under polarized light are described under the respective assigned liquid-crystalline phase.

| Surfactant | Phase Sequence                               |   |                                           |   |                                                  |   |                                     |   |    |
|------------|----------------------------------------------|---|-------------------------------------------|---|--------------------------------------------------|---|-------------------------------------|---|----|
| 8Lys12     | $L_1$<br><i>isotropic</i><br><i>(liquid)</i> | → | $H_1$<br><i>marble texture</i>            | → | $L_\alpha$<br><i>mosaic texture</i>              | → | cr                                  |   |    |
| 8Lys14     | $L_1$<br><i>isotropic</i>                    | → | $H_1$<br><i>marble texture</i>            | → | cub<br><i>isotropic</i><br><i>(very viscous)</i> | → | $L_\alpha$<br><i>mosaic texture</i> | → | cr |
| 8Lys16     | $L_1$<br><i>isotropic</i>                    | → | $H_1$<br><i>striated texture</i>          | → | cub<br><i>isotropic</i>                          | → | $L_\alpha$<br><i>mosaic texture</i> | → | cr |
| 12Lys8     | $L_1$<br><i>isotropic</i>                    | → | $H_1$<br><i>granulated marble texture</i> | → | $L_\alpha$<br><i>mosaic texture</i>              | → | cr                                  |   |    |
| 14Lys8     | $L_1$<br><i>isotropic</i>                    | → | $H_1$<br><i>marble texture</i>            | → | $L_\alpha$<br><i>mosaic texture</i>              | → | cr                                  |   |    |
| 16Lys8     | $L_1$<br><i>isotropic</i>                    | → | $H_1$<br><i>marble texture</i>            | → | cub<br><i>isotropic</i>                          | → | $L_\alpha$<br><i>mosaic texture</i> | → | cr |
| 12Lys16    |                                              |   | $L_1$<br><i>isotropic</i>                 | → | $L_\alpha$<br><i>oily-streaks</i>                | → | cr                                  |   |    |
| 16Lys12    |                                              |   | $L_1$<br><i>isotropic</i>                 | → | $L_\alpha$<br><i>oily-streaks</i>                | → | cr                                  |   |    |
